# Supplementary material for: Individual Differences in Statistical Learning: Conceptual and Measurement Issues
Source: Oxford University Press journal article supplement (doi:10.1525/collabra.41), 2016-01-01
Supplement: collabra-2-41-s2.xlsx [file collabra-2-41-s2.xlsx]

## Sheet: Sheet1
ID	ORDER of FORCED CHOICE (first or second)	ORDER of FORCED CHOICE (first= 0, second = 1)	Lang_Order1	Lang_Order2	Time1_Lang1_AFC	Time1_Lang2_AFC	Time1_Lang3_AFC	Time1_Lang4_AFC	Time2_Lang1_AFC	Time2_Lang2_AFC	Time2_Lang3_AFC	Time2_Lang4_AFC	Time1 AVG_AFC	Time2_AVG_AFC	T1_Lang1_Avg_Word_Endorse	T1_Lang1_Avg_Partword_Endorse	T1_Lang1_Endorse_Diff	T1_Lang2_Avg_Word_Endorse	T1_Lang2_Avg_Partword_Endorse	T1_Lang2_Endorse_Diff	T1_Lang3_Avg_Word_Endorse	T1_Lang3_Avg_Partword_Endorse	T1_Lang3_Endorse_Diff	T1_Lang4_Avg_Word_Endorse	T1_Lang4_Avg_Partword_Endorse	T1_Lang4_Endorse_Diff	T2_Lang1_Avg_Word_Endorse	T2_Lang1_Avg_Partword_Endorse	T2_Lang1_Endorse_Diff	T2_Lang2_Avg_Word_Endorse	T2_Lang2_Avg_Partword_Endorse	T2_Lang2_Endorse_Diff	T2_Lang3_Avg_Word_Endorse	T2_Lang3_Avg_Partword_Endorse	T2_Lang3_Endorse_Diff	T2_Lang4_Avg_Word_Endorse	T2_Lang4_Avg_Partword_Endorse	T2_Lang4_Endorse_Diff	TIME1_DIFF_AVG	TIME2_DIFF_AVG	TIME1_AVG_WORD_ENDORSE	TIME1_AVG_PW_ENDORSE	TIME2_AVG_WORD_ENDORSE	TIME2_AVG_PW_ENDORSE		LANG1_AFC_AVG	LANG2_AFC_AVG	LANG3_AFC_AVG	LANG4_AFC_AVG
1	1	0	1 2 3 4	1 2 3 4	0.625	0.75	0.5	1					0.71875		4.75	4.5	0.25	4.75	4.75	0	5	5	0	4.5	2.5	2.5													0.6875		4.75	4.1875				0.625	0.75	0.5	1
2	2	1	5 6 7 8	1 2 3 4	0.5	0.375	0.625	1					0.625		4.75	5	-0.25	5	5	0	4.5	5	-0.5	5	2	3													0.5625		4.8125	4.25				0.5	0.375	0.625	1
3	1	0	1 2 4 3	1 2 4 3	0.25	0.25	0.5	0.875	0.375	0.375	0.375	1	0.46875	0.53125	3	4.25	-1.25	2.75	4	-1.25	4	3.25	0.75	4.5	2.5	2	4	4.5	-0.5	3.5	3.75	-0.25	3.5	4.25	-0.75	4.25	3.5	0.75	0.0625	-0.1875	3.5625	3.5	3.8125	4		0.3125	0.3125	0.4375	0.9375
4	2	1	5 6 8 7	1 2 4 3	0.625	0.75	0	0.875	0.5	0.875	0.375	0.75	0.5625	0.625	5	5	0	3.75	3.5	0.25	2.25	3	-0.75	5	2	3	5	5	0	4.5	4	0.5	4	4	0	3	3.75	-0.75	0.625	-0.0625	4	3.375	4.125	4.1875		0.5625	0.8125	0.1875	0.8125
5	1	0	1 3 2 4	1 3 2 4	0.625	0.5	0.625	1	0.625	0.75	0.625	0.875	0.6875	0.71875	4.5	4	0.5	4.25	3.75	0.5	4	3.75	0.25	4.75	3.75	1	4.5	4	0.5	4	4.5	-0.5	4.25	4.25	0	4.5	3.75	0.75	0.5625	0.1875	4.375	3.8125	4.3125	4.125		0.625	0.625	0.625	0.9375
6	1	0	5 7 6 8	1 3 2 4	0.75	0.625	0.5	1	0.875	0.75	0.5	0.5	0.71875	0.65625	5	3.75	1.25	5	4.5	0.5	4	4	0	4.75	3.5	1.25	5	4	1	5	5	0	5	4.75	0.25	5	5	0	0.75	0.3125	4.6875	3.9375	5	4.6875		0.8125	0.6875	0.5	0.75
7	1	0	1 3 4 2	1 3 4 2	0.5	0.25	0.625	0.625	0.5	0.625	0.75	0.25	0.5	0.53125	4	3.75	0.25	4	4	0	4	3.75	0.25	3.75	3.75	0	4	4	0	4	4	0	4	4	0	4	4	0	0.125	0	3.9375	3.8125	4	4		0.5	0.4375	0.6875	0.4375
8	2	1	5 7 8 6	1 3 4 2	1	0.5	0.75	1	1	0.875	0.5	1	0.8125	0.84375	4	4	0	3.75	4	-0.25	4	3.5	0.5	4.25	2.5	1.75	4.5	3.25	1.25	4.5	3.75	0.75	3.5	3.25	0.25	4.75	1.75	3	0.5	1.3125	4	3.5	4.3125	3		1	0.6875	0.625	1
9	2	1	1 4 2 3	1 4 2 3	0.625	0.625	0.5	1					0.6875		3	4.5	-1.5	3.75	2.5	1.25	3.5	3.25	0.25	4.5	3	1.5													0.375		3.6875	3.3125				0.625	0.625	0.5	1
10	2	1	5 8 6 7	1 4 2 3	0.75	0.5	0.375	0.75	0.75	0.75	0.375	0.75	0.59375	0.65625	4.5	3.25	1.25	3.75	4.25	-0.5	4	4.5	-0.5	4	2.75	1.25	4	4	0	3.5	4	-0.5	4	3.75	0.25	3.25	2.25	1	0.375	0.1875	4.0625	3.6875	3.6875	3.5		0.75	0.625	0.375	0.75
11	1	0	1 4 3 2	1 4 3 2	0.5	0.75	0.625	0.75	0.75		0.5	1	0.65625	0.75	3.5	3.25	0.25	4	4.5	-0.5	4	3.75	0.25	4.25	3.75	0.5	4	3.75	0.25				4.5	3.75	0.75	4.75	3.75	1	0.125	0.666667	3.9375	3.8125	4.41667	3.75		0.625	0.75	0.5625	0.875
12	2	1	5 8 7 6	1 4 3 2	0.625	0.875	1	0.875					0.84375		3.75	3.25	0.5	4	2.75	1.25	4.25	1.5	2.75	5	1.75	3.25													1.9375		4.25	2.3125				0.625	0.875	1	0.875
13	1	0	2 1 3 4	2 1 3 4	0.625	0.75	0.5	0.875	0.875	0.875	0.5	0.625	0.6875	0.71875	3.75	3.5	0.25	3.75	3.75	0	4	4	0	3.5	3.25	0.25	3	3.75	-0.75	3.75	3.5	0.25	3.5	3.25	0.25	3.5	3.5	0	0.125	-0.0625	3.75	3.625	3.4375	3.5		0.75	0.8125	0.5	0.75
14	2	1	6 5 7 8	2 1 3 4	0.5	0.875	0.375	0.5	0.625	0.5	1	0.625	0.5625	0.6875	3.75	4.25	-0.5	4.25	4.75	-0.5	3.25	4.75	-1.5	3	2	1	3.5	4.25	-0.75	3.5	2.75	0.75	5	3	2	2.75	3.5	-0.75	-0.375	0.3125	3.5625	3.9375	3.6875	3.375		0.5625	0.6875	0.6875	0.5625
15	1	0	2 1 4 3	2 1 4 3	0.5	0.625	0.75	0.875	0.375	0.625	0.875	0.625	0.6875	0.625	5	4.5	0.5	4	4.25	-0.25	4.5	4.25	0.25	4.5	3.75	0.75	3.75	4.25	-0.5	3.5	3.75	-0.25	3.75	3.5	0.25	4.5	3.25	1.25	0.3125	0.1875	4.5	4.1875	3.875	3.6875		0.4375	0.625	0.8125	0.75
16	2	1	6 5 8 7	2 1 4 3	0.375	0.25	0.375	1	0.5	0.625	0.875	0.75	0.5	0.6875	4.25	4.25	0	5	4.75	0.25	4.5	2.75	1.75	3.75	2.5	1.25	5	4	1	4.75	5	-0.25	4	3.5	0.5	4.75	3	1.75	0.8125	0.75	4.375	3.5625	4.625	3.875		0.4375	0.4375	0.625	0.875
17	1	0	2 3 1 4	2 3 1 4	0.375	0.25	0.625	1	0.5	0.875	0.625	0.875	0.5625	0.71875	3.5	3.25	0.25	3.75	4.75	-1	4.5	4	0.5	4.75	2	2.75	4.75	4.25	0.5	4.25	4	0.25	4.25	4	0.25	4.75	3	1.75	0.625	0.6875	4.125	3.5	4.5	3.8125		0.4375	0.5625	0.625	0.9375
18	2	1	6 7 5 8	2 3 1 4	0.625	0.125		0.75	0.75	0.625	0.875	0.875	0.5	0.78125	4	3.5	0.5	3.5	2	1.5				4	2.5	1.5	3.75	4	-0.25	4.25	3.25	1	4	3.75	0.25	4	3	1	1.16667	0.5	3.83333	2.66667	4	3.5		0.6875	0.375	0.875	0.8125
19	1	0	2 3 4 1	2 3 4 1	0.375	0.875	0.75	0.875	0.75	0.75	0.875	0.875	0.71875	0.8125	3.75	3.5	0.25	3.25	3	0.25	4	3	1	4.25	2.75	1.5	3.75	3.75	0	4	3.75	0.25	3.5	4	-0.5	4.25	2.75	1.5	0.75	0.3125	3.8125	3.0625	3.875	3.5625		0.5625	0.8125	0.8125	0.875
20	2	1	6 7 8 5	2 3 4 1	0.625	0.875	0.625	0.75	0.75	0.75	0.5	0.875	0.71875	0.71875	4	1.5	2.5	3	1.75	1.25	3.25	2	1.25	2.5	2	0.5	2.75	2	0.75	3	2.75	0.25	3	3	0	4.25	1.25	3	1.375	1	3.1875	1.8125	3.25	2.25		0.6875	0.8125	0.5625	0.8125
21	1	0	2 4 1 3	2 4 1 3	0.25	0.625	0.5	0.875	0.625	0.625	0.875	0.375	0.5625	0.625	2.5	4.25	-1.75	3.25	2.25	1	3.5	3.5	0	4.25	3.5	0.75	3.75	3.25	0.5	3.5	3.25	0.25	3.5	3	0.5	4.75	3.25	1.5	0	0.6875	3.375	3.375	3.875	3.1875		0.4375	0.625	0.6875	0.625
22	2	1	6 8 5 7	2 4 1 3	0.875	0.625	0.75	1	1	0.75	1	1	0.8125	0.9375	5	3.25	1.75	4.75	4.5	0.25	5	2.25	2.75	5	4	1	5	1.75	3.25	4	3	1	5	1	4	5	2	3	1.4375	2.8125	4.9375	3.5	4.75	1.9375		0.9375	0.6875	0.875	1
24	2	1	6 8 7 5	2 4 3 1	0.875	0.5	0.5	0.75	0.375	0.75	0.5	1	0.65625	0.65625	4.75	3	1.75	3.75	4	-0.25	4.5	2.75	1.75	3.75	2.5	1.25	2.75	3.25	-0.5	4	2.25	1.75	3.25	3.75	-0.5	4.5	2.5	2	1.125	0.6875	4.1875	3.0625	3.625	2.9375		0.625	0.625	0.5	0.875
25	1	0	3 2 1 4	3 2 1 4	0.5	0.25	0.5	1	0.5	0.5	0.75	1	0.5625	0.6875	4.75	4.25	0.5	3.5	4.25	-0.75	3.75	2.5	1.25	5	3.75	1.25	4.5	4.5	0	4	4.75	-0.75	3.5	5	-1.5	5	3.5	1.5	0.5625	-0.1875	4.25	3.6875	4.25	4.4375		0.5	0.375	0.625	1
26	2	1	7 6 5 8	3 2 1 4	0.5	0.5	0.75	0.75	0.625	0.5	0.875	1	0.625	0.75	3.25	4	-0.75	3	2.5	0.5	4.75	4	0.75	4	3	1	3.5	4	-0.5	3	3.25	-0.25	5	3.75	1.25	4.5	3.25	1.25	0.375	0.4375	3.75	3.375	4	3.5625		0.5625	0.5	0.8125	0.875
27	1	0	3 2 4 1	3 2 4 1	1	0.375	0.625	0.5	1	0.625	1	0.625	0.625	0.8125	4.75	3.75	1	4.5	4.5	0	4	3.5	0.5	4.5	2.75	1.75	4.75	4	0.75	4.25	4.25	0	4.75	3.5	1.25	4.5	3	1.5	0.8125	0.875	4.4375	3.625	4.5625	3.6875		1	0.5	0.8125	0.5625
28	2	1	7 6 8 5	3 2 4 1	0.375	0.5	0.5	1	0.625	0.625	0.25	0.875	0.59375	0.59375	5	4	1	4.5	5	-0.5	5	4	1	4.75	1	3.75	4.25	4.25	0	3.75	4	-0.25	3.75	3.25	0.5	4.5	2.75	1.75	1.3125	0.5	4.8125	3.5	4.0625	3.5625		0.5	0.5625	0.375	0.9375
29	1	0	3 1 2 4	3 1 2 4	0.375	0.75	0.875	0.5	0.75	0.625	0.375	0.875	0.625	0.65625	4.5	4.5	0	3.25	3.75	-0.5	3	3.25	-0.25	3.75	3.5	0.25	4.25	4	0.25	3.75	4	-0.25	4	4.25	-0.25	4.5	2.5	2	-0.125	0.4375	3.625	3.75	4.125	3.6875		0.5625	0.6875	0.625	0.6875
30	2	1	7 5 6 8	3 1 2 4	0.25	0.5	0.625	0.875	0.5	0.5	0.625	0.875	0.5625	0.625	3.25	4.75	-1.5	4	4.25	-0.25	5	4	1	4	2	2	2.75	4.5	-1.75	3.25	3.5	-0.25	4.5	4.75	-0.25	4.25	2.5	1.75	0.3125	-0.125	4.0625	3.75	3.6875	3.8125		0.375	0.5	0.625	0.875
31	1	0	3 1 4 2	3 1 4 2	0.375	0.875	0.875	0.875	0.25	0.5	0.25	0.75	0.75	0.4375	3.25	3.75	-0.5	3.75	3.5	0.25	4	3	1	4.5	2.5	2	3.75	4	-0.25	3.5	3.75	-0.25	3.75	4	-0.25	4.25	2.75	1.5	0.6875	0.1875	3.875	3.1875	3.8125	3.625		0.3125	0.6875	0.5625	0.8125
32	2	1	7 5 8 6	3 1 4 2	0.875	0.25	0.625		0.75	0.5	0.625	0.625	0.583333	0.625	4.25	3.25	1	4	4.5	-0.5	3.25	3.25	0				4.25	3.25	1	3.5	2.25	1.25	3.5	2.25	1.25	4.5	2.25	2.25	0.166667	1.4375	3.83333	3.66667	3.9375	2.5		0.8125	0.375	0.625	0.625
33	1	0	3 4 2 1	3 4 2 1	1	0.375	0.5	0.875					0.6875		3.75	3.5	0.25	3.75	4.25	-0.5	4.5	3.25	1.25	4.75	3.25	1.5													0.625		4.1875	3.5625				1	0.375	0.5	0.875
34	2	1	7 8 6 5	3 4 2 1	0.625	1	0.625	1	1	0.5	0.75		0.8125	0.75	4.5	4.5	0	4	2.75	1.25	3.75	2.5	1.25	4.25	2.5	1.75	4.25	4.5	-0.25	2.5	4.5	-2	5	3.75	1.25				1.0625	-0.333333	4.125	3.0625	3.91667	4.25		0.8125	0.75	0.6875	1
35	1	0	3 4 1 2	3 4 1 2	0.75	0.375	0.75	1	0.75	0.875	0.75	0.625	0.71875	0.75	4.75	3.75	1	4	4.25	-0.25	4.5	4.25	0.25	4.25	4	0.25	3.25	3.25	0	4.75	4	0.75	4	2.75	1.25	3.25	3.5	-0.25	0.3125	0.4375	4.375	4.0625	3.8125	3.375		0.75	0.625	0.75	0.8125
36	2	1	7 8 5 6	3 4 1 2	0.25	0.75		1	0.375	0.875	0.875	1	0.666667	0.78125	4.25	5	-0.75	4.5	3.5	1				5	1.5	3.5	4.5	5	-0.5	4.25	3.75	0.5	4	3.75	0.25	5	1.5	3.5	1.25	0.9375	4.58333	3.33333	4.4375	3.5		0.3125	0.8125	0.875	1
37	1	0	4 2 3 1	4 2 3 1	1	0.625	0.875	1	0.75	0.625	1	1	0.875	0.84375	3.75	2.75	1	2.75	3	-0.25	4	3	1	4.5	3.25	1.25	3.75	2.75	1	3.5	2.75	0.75	4.5	2.75	1.75	4.75	3	1.75	0.75	1.3125	3.75	3	4.125	2.8125		0.875	0.625	0.9375	1
38	2	1	8 6 7 5	4 2 3 1	0.75	0.5	0.375	1	0.75	0.5	0.5	0.75	0.65625	0.625	3.5	4.5	-1	3.5	2.5	1	3	2.5	0.5	3.75	3.5	0.25	3.75	4.25	-0.5	3.5	3.5	0	3	3.5	-0.5	4.5	2.75	1.75	0.1875	0.1875	3.4375	3.25	3.6875	3.5		0.75	0.5	0.4375	0.875
39	1	0	4 2 1 3	4 2 1 3	0	1	0.25	1	0.375	0.625	0.375	1	0.5625	0.59375	3.25	4.25	-1	4.5	3.75	0.75	4	3.5	0.5	3.75	2.75	1	4	4	0	4.5	3.75	0.75	3.75	3.5	0.25	4.75	2.5	2.25	0.3125	0.8125	3.875	3.5625	4.25	3.4375		0.1875	0.8125	0.3125	1
40	2	1	8 6 5 7	4 2 1 3	0.5	0.5	0.625	0.75	0.625	0.25	0.5	0.875	0.59375	0.5625	4	4.25	-0.25	3.75	4.5	-0.75	3.5	4.5	-1	4.75	2.75	2	4	4.25	-0.25	4.5	3.75	0.75	3.5	3.5	0	4.75	1.25	3.5	0	1	4	4	4.1875	3.1875		0.5625	0.375	0.5625	0.8125
41	1	0	4 3 2 1	4 3 2 1	1	0.625	0.625	0.75	0.75	0.25	1	0.75	0.75	0.6875	3.5	2	1.5	3.75	3.75	0	3.5	2.5	1	3.25	3.5	-0.25	3.75	3.25	0.5	3	3.25	-0.25	5	2.25	2.75	3.5	3.5	0	0.5625	0.75	3.5	2.9375	3.8125	3.0625		0.875	0.4375	0.8125	0.75
42	2	1	8 7 6 5	4 3 2 1	0.875	0.75	0.625	0.625	0.5	0.5	0.625	0.625	0.71875	0.5625	4	4	0	4	3.25	0.75	3	3	0	3	2	1	5	4.25	0.75	4	4.5	-0.5	4	3.75	0.25	4.75	3.25	1.5	0.4375	0.5	3.5	3.0625	4.4375	3.9375		0.6875	0.625	0.625	0.625
43	1	0	4 3 1 2	4 3 1 2	0.375	0.625	0.25	0.625	0.375	0.375	0.375	1	0.46875	0.53125	3.25	3.5	-0.25	3.5	4	-0.5	3.25	3.75	-0.5	3.5	2.25	1.25	3.5	3.75	-0.25	3.75	4.25	-0.5	2.75	4	-1.25	4.25	2.25	2	0	0	3.375	3.375	3.5625	3.5625		0.375	0.5	0.3125	0.8125
44	2	1	8 7 5 6	4 3 1 2	0.75	0.125	0.625	0.875	0.875	0.625	1	0.625	0.59375	0.78125	4.25	3.25	1	3	4.25	-1.25	5	2.25	2.75	5	2	3	4.75	3	1.75	3.25	4	-0.75	5	2.75	2.25	5	2.25	2.75	1.375	1.5	4.3125	2.9375	4.5	3		0.8125	0.375	0.8125	0.75
45	1	0	4 1 2 3	4 1 2 3	0.75	0.75	1	0.625	0.875	0.75		1	0.78125	0.875	4.25	3.75	0.5	4.25	3.25	1	5	2.75	2.25	4.75	3	1.75	4.25	3.25	1	3.5	2.5	1				4.75	1.25	3.5	1.375	1.83333	4.5625	3.1875	4.16667	2.33333		0.8125	0.75	1	0.8125
46	2	1	8 5 6 7	4 1 2 3	0.875	0	0.625	0.75	1	0.5	0.625	0.625	0.5625	0.6875	4.5	4.25	0.25	4	4.25	-0.25	4.75	4.25	0.5	4.5	3.75	0.75	5	5	0	4.75	5	-0.25	4.5	4.5	0	5	5	0	0.3125	-0.0625	4.4375	4.125	4.8125	4.875		0.9375	0.25	0.625	0.6875
47	1	0	4 1 3 2	4 1 3 2	1	0.375	0.875	0.875	0.75	1	0.75	1	0.78125	0.875	4.5	4	0.5	3.5	2.75	0.75	4.5	2.75	1.75	5	4	1	4.5	5	-0.5	4.5	2	2.5	4.25	4	0.25	4.5	2.25	2.25	1	1.125	4.375	3.375	4.4375	3.3125		0.875	0.6875	0.8125	0.9375
48	2	1	8 5 7 6	4 1 3 2	1	0.75	1	0.75	0.875	0.75	0.5		0.875	0.708333	5	3.25	1.75	4	3.25	0.75	4	2.5	1.5	4.25	4	0.25	5	4	1	4.5	4	0.5	4.75	2.25	2.5				1.0625	1.33333	4.3125	3.25	4.75	3.41667		0.9375	0.75	0.75	0.75
49	1	0	1 2 3 4	1 2 3 4	0.25	0.375	0.625	0.875	0.125	0.75	0.5	0.75	0.53125	0.53125	3.5	3.75	-0.25	4	3.75	0.25	4	3.75	0.25	3.5	3.5	0	3.25	4	-0.75	4	3.75	0.25	3.5	2.75	0.75	3.25	2.75	0.5	0.0625	0.1875	3.75	3.6875	3.5	3.3125		0.1875	0.5625	0.5625	0.8125
50	2	1	5 6 7 8	1 2 3 4	0.5	0.875	0.25	0.625					0.5625		4	4.75	-0.75	4.5	2.75	1.75	3.75	3.5	0.25	4.25	3	1.25													0.625		4.125	3.5				0.5	0.875	0.25	0.625
51	1	0	1 2 4 3	1 2 4 3	0.25	0.5	0.625	0.75	0.5	0.875	0.625	1	0.53125	0.75	4.25	4.5	-0.25	3.75	4.25	-0.5	4.5	4.5	0	4.5	3.25	1.25	4	4	0	3	3	0	3.75	2.75	1	4.25	3	1.25	0.125	0.5625	4.25	4.125	3.75	3.1875		0.375	0.6875	0.625	0.875
52	2	1	5 6 8 7	1 2 4 3	0.875	0.375		0.875	0.25	0.25	0.25	0.875	0.708333	0.40625	5	2.25	2.75	3.75	3.75	0				4.5	2	2.5	3.75	3	0.75	3	4.75	-1.75	3.5	3.75	-0.25	4.25	1.75	2.5	1.75	0.3125	4.41667	2.66667	3.625	3.3125		0.5625	0.3125	0.25	0.875
53	1	0	1 2 4 3	1 2 4 3	0.875	0.375	0.25	1	0.75	0.5	0.375	1	0.625	0.65625	4	3.5	0.5	3.5	2.5	1	3.25	3.5	-0.25	4.5	1.75	2.75	4.25	3	1.25	3.25	3	0.25	3.5	2.75	0.75	4	1.75	2.25	1	1.125	3.8125	2.8125	3.75	2.625		0.8125	0.4375	0.3125	1
54	2	1	5 6 8 7	1 2 4 3	0.375	0.625	0.625	0.875	0.625	0.75	0.75	1	0.625	0.78125	4	4.25	-0.25	4	4	0	3.75	3	0.75	4.25	3	1.25	4	3.75	0.25	4	2.75	1.25	4	3.25	0.75	4.5	2.25	2.25	0.4375	1.125	4	3.5625	4.125	3		0.5	0.6875	0.6875	0.9375
55	1	0	1 3 2 4	1 3 2 4	0.75	0.375	0.125	0.875					0.53125		4	3.25	0.75	3.75	3.5	0.25	4	3.25	0.75	4.25	3.25	1													0.6875		4	3.3125				0.75	0.375	0.125	0.875
56	2	1	5 7 6 8	1 3 2 4	0.625	0.625	0.5	0.75					0.583333	0.625	5	5	0	4.75	3.5	1.25	4.5	3	1.5	5	2	3													1.4375		4.8125	3.375				0.625	0.625	0.5	0.75
57	1	0	1 3 4 2	1 3 4 2	0.625	0.75	0.125	1	0.5	0.75	0.75	0.875	0.625	0.71875	5	5	0	4.5	4.5	0	1.75	4.25	-2.5	2.25	3	-0.75	4.25	5	-0.75	3.75	3.5	0.25	3.25	4.5	-1.25	4.75	3.75	1	-0.8125	-0.1875	3.375	4.1875	4	4.1875		0.5625	0.75	0.4375	0.9375
58	2	1	5 7 8 6	1 3 4 2	0.75	0.25	0.5	0.5	0.5	0.625	0.375	0.5	0.5	0.5	3.5	3.75	-0.25	4.25	3.75	0.5	3.5	3	0.5	3	2.5	0.5	3.25	4.25	-1	4.25	4	0.25	3.75	3.75	0	4	2.75	1.25	0.3125	0.125	3.5625	3.25	3.8125	3.6875		0.625	0.4375	0.4375	0.5
59	1	0	1 4 2 3	1 4 2 3	0.625	0.5	0.75	1					0.71875		5	4.5	0.5	4	3.75	0.25	4.5	4.25	0.25	4.5	4.25	0.25													0.3125		4.5	4.1875				0.625	0.5	0.75	1
60	2	1	5 8 6 7	1 4 2 3	0.375	0.75	0.625	0.875	0.5	0.625	0.625	0.625	0.65625	0.59375	3	4.5	-1.5	4	3.75	0.25	4	3.75	0.25	4.5	2.75	1.75	4	4	0	4	3	1	3.5	3.75	-0.25	3.25	3.5	-0.25	0.1875	0.125	3.875	3.6875	3.6875	3.5625		0.4375	0.6875	0.625	0.75
61	1	0	1 4 3 2	1 4 3 2	0.5	0.75	0.5	0.5	0.5	0.5	0.5	0.75	0.5625	0.5625	3.5	3	0.5	3	3	0	4.5	3.25	1.25	3.75	3	0.75	1.5	1	0.5	3.75	3.25	0.5	2.75	3	-0.25	3	3	0	0.625	0.1875	3.6875	3.0625	2.75	2.5625		0.5	0.625	0.5	0.625
62	2	1	5 8 7 6	1 4 3 2	0.5	0.625	0.625	1					0.6875		4.5	3.5	1	4.5	3.25	1.25	4.5	3.75	0.75	5	3.5	1.5													1.125		4.625	3.5				0.5	0.625	0.625	1
63	1	0	2 1 3 4	2 1 3 4	0.25	0.75	0.5	0.875	0.5	0.375	0.5	0.875	0.59375	0.5625	5	4.5	0.5	5	5	0	5	4.5	0.5	5	4.5	0.5	4	3.25	0.75	3.5	2.5	1	3.25	2.25	1	2.75	2.25	0.5	0.375	0.8125	5	4.625	3.375	2.5625		0.375	0.5625	0.5	0.875
64	2	1	6 5 7 8	2 1 3 4		0.5	0.625	0.875	0.25	0.625	0.875	0.875	0.666667	0.65625				4.5	2.75	1.75	3.6	4	-0.4	4.25	2.25	2	3.25	4.75	-1.5	2.25	2.5	-0.25	4.5	3.5	1	3.5	1.75	1.75	1.11667	0.25	4.11667	3	3.375	3.125		0.25	0.5625	0.75	0.875
66	2	1	6 5 8 7	2 1 4 3	0.625	0.375	0.875	0.375	0.625	0.5	0.375	0.625	0.5625	0.53125	4	4.5	-0.5	5	3	2	3.5	3	0.5	4	2.75	1.25	3.5	3.25	0.25	5	4.5	0.5	3	4	-1	4.5	3.25	1.25	0.8125	0.25	4.125	3.3125	4	3.75		0.625	0.4375	0.625	0.5
67	1	0	2 3 1 4	2 3 1 4											3.25	3.75	-0.5	3.5	3.75	-0.25	4.25	3.5	0.75				4.25	3.25	1	4	3.5	0.5	4	3.5	0.5	4.5	2.25	2.25	0	1.0625	3.66667	3.66667	4.1875	3.125
68	2	1	6 7 5 8	2 3 1 4	0.875	0.375	0.625	0.75	0.75	0.5	0.375	0.875	0.65625	0.625	4.5	3.75	0.75	3.75	4.75	-1	4.75	4.25	0.5	4.75	3.75	1	4.25	3.75	0.5	4.25	4.75	-0.5	4	3.75	0.25	5	3.5	1.5	0.3125	0.4375	4.4375	4.125	4.375	3.9375		0.8125	0.4375	0.5	0.8125
69	1	0	2 3 4 1	2 3 4 1	0.125	0.75	0.875	0.5	1	0.875	0.75	0.75	0.5625	0.84375	4	3	1	5	4.5	0.5	4.5	3.5	1	4.25	3.25	1	4.25	3.25	1	4.5	2.25	2.25	3.75	4.25	-0.5	4.25	2.5	1.75	0.875	1.125	4.4375	3.5625	4.1875	3.0625		0.5625	0.8125	0.8125	0.625
71	1	0	2 4 1 3	2 4 1 3	0.5	1	0.25	1	0.625	1	0.75	0.75	0.6875	0.78125	3	4	-1	3.75	2	1.75	3.5	3.25	0.25	4	2.5	1.5	3.75	3.5	0.25	4	3	1	3.75	3.5	0.25	4	3.5	0.5	0.625	0.5	3.5625	2.9375	3.875	3.375		0.5625	1	0.5	0.875
72	2	1	6 8 5 7	2 4 1 3	0.375	0.75	1	0.75	0.75	0.375	0.875	0.875	0.71875	0.71875	5	5	0	4.5	4	0.5	4.75	3	1.75	4.25	2.75	1.5	5	4.5	0.5	5	4	1	4.75	3	1.75	5	2	3	0.9375	1.5625	4.625	3.6875	4.9375	3.375		0.5625	0.5625	0.9375	0.8125
73	1	0	2 4 3 1	2 4 3 1	0.75	0.25	0.875	0.875	0.75	0.25	0.5	1	0.6875	0.625	4.5	2.5	2	2.25	4	-1.75	3	3.25	-0.25	4.75	2.5	2.25	4	3.25	0.75	3.25	3.75	-0.5	4.25	3	1.25	5	2.25	2.75	0.5625	1.0625	3.625	3.0625	4.125	3.0625		0.75	0.25	0.6875	0.9375
74	2	1	6 8 7 5	2 4 3 1	0.5	0.625	0.5	0.875	0.375	0.625	0.75	0.75	0.625	0.625	4	4	0	4.75	3.5	1.25	3	3	0	4.75	2.5	2.25	3	3	0	3.5	2.5	1	3	2.5	0.5	3	3	0	0.875	0.375	4.125	3.25	3.125	2.75		0.4375	0.625	0.625	0.8125
75	1	0	3 2 1 4	3 2 1 4	0.375	0.75	0.625	0.875	0.375	1	0.75	1	0.65625	0.78125	2.75	3.5	-0.75	3.5	3.5	0	4	3	1	5	1.25	3.75	2.75	4	-1.25	4.5	3.5	1	4.75	3.25	1.5	3	3	0	1	0.3125	3.8125	2.8125	3.75	3.4375		0.375	0.875	0.6875	0.9375
76	2	1	7 6 5 8	3 2 1 4	1	0.75	1	1	0.5	0.5	0.875	1	0.9375	0.71875	4.5	3.25	1.25	4.5	3	1.5	3.5	3.75	-0.25	4.75	1.5	3.25	4.25	3.75	0.5	4	2.5	1.5	4.75	2.5	2.25	5	1.75	3.25	1.4375	1.875	4.3125	2.875	4.5	2.625		0.75	0.625	0.9375	1
77	1	0	3 2 4 1	3 2 4 1	0.625	0.75	0.625	1	0.125	0.625	0.625	1	0.75	0.59375	3.75	4	-0.25	4	4	0	2.5	3.5	-1	5	3.5	1.5	3	3.5	-0.5	4.25	3.25	1	3.75	3.5	0.25	3	3.5	-0.5	0.0625	0.0625	3.8125	3.75	3.5	3.4375		0.375	0.6875	0.625	1
78	2	1	7 6 8 5	3 2 4 1	0.625	0.5	0.25	0.875	0.5	0.375		1	0.5625	0.625	4.5	3.25	1.25	5	4.5	0.5	2.75	3.5	-0.75	4.5	2.25	2.25	3.75	4	-0.25	4.5	4	0.5				4.75	2	2.75	0.8125	1	4.1875	3.375	4.33333	3.33333		0.5625	0.4375	0.25	0.9375
79	1	0	3 1 2 4	3 1 2 4	0.625	0.625	0.25	1	1	0.25	0.25	1	0.625	0.625	4.25	4	0.25	3.5	3.75	-0.25	3.75	4.25	-0.5	5	3.5	1.5	5	2	3	3.5	4.25	-0.75	3.25	4.5	-1.25	4.5	4	0.5	0.25	0.375	4.125	3.875	4.0625	3.6875		0.8125	0.4375	0.25	1
80	2	1	7 5 6 8	3 1 2 4	0.25	0.125	0.875	1	0.5	0.875	0.75	0.75	0.5625	0.71875	2.75	3.5	-0.75	4	3.75	0.25	3.25	2.25	1	5	2.75	2.25	3.5	2.75	0.75	3.25	2.5	0.75	3.75	2.75	1	2.5	2.5	0	0.6875	0.625	3.75	3.0625	3.25	2.625		0.375	0.5	0.8125	0.875
81	1	0	3 1 4 2	3 1 4 2	0.5	0.625	0.375	1	0.5	0.875	0.875	1	0.625	0.8125	3.5	3.25	0.25	3.75	3.25	0.5	3.5	3.5	0	4.25	2.25	2	3.75	3.5	0.25	4	3.25	0.75	4	3.25	0.75	5	2.75	2.25	0.6875	1	3.75	3.0625	4.1875	3.1875		0.5	0.75	0.625	1
82	2	1	7 5 8 6	3 1 4 2	0.75		0.75	1	0.75	1	0.5	1	0.833333	0.8125	3.75	3	0.75				4.5	4	0.5	4.5	3	1.5	3	3	0	5	3	2	3	3	0	5	3	2	0.916667	1	4.25	3.33333	4	3		0.75	1	0.625	1
83	2	1	7 8 6 5	3 4 2 1	0.75	0.25	0.875	1	0.875	1	1	0.875	0.71875	0.9375	4.75	3.25	1.5	3	3.5	-0.5	3	3.5	-0.5	4	2.5	1.5	4	3	1	4	2.75	1.25	4	2.5	1.5	3.75	2	1.75	0.5	1.375	3.6875	3.1875	3.9375	2.5625		0.8125	0.625	0.9375	0.9375
85	1	0	3 4 1 2	3 4 1 2	0.125	0.5	0.5	1	0.375	1	0.625	1	0.53125	0.75	2.75	4	-1.25	4	3.25	0.75	3	3.5	-0.5	4.75	2.5	2.25	2.5	2.5	0	4	2.5	1.5	3.25	3.75	-0.5	4	2.25	1.75	0.3125	0.6875	3.625	3.3125	3.4375	2.75		0.25	0.75	0.5625	1
87	1	0	4 2 3 1	4 2 3 1	0.25	0.75	0.5	0.75					0.5625		3.75	4	-0.25	3.25	3.25	0	3.75	3.75	0	4.5	2.75	1.75													0.375		3.8125	3.4375				0.25	0.75	0.5	0.75
88	2	1	8 6 7 5	4 2 3 1	0.5	0.25	0.5	0.875	0.375	0.5	0.375	0.875	0.53125	0.53125	3.75	4	-0.25	3.75	4	-0.25	4.25	3.25	1	4.5	2.5	2	4.25	3.75	0.5	3.75	3.5	0.25	3.25	4	-0.75	4.25	1.75	2.5	0.625	0.625	4.0625	3.4375	3.875	3.25		0.4375	0.375	0.4375	0.875
89	1	0	4 2 1 3	4 2 1 3	1	0.75	0.5	0.625					0.71875		4.25	3.75	0.5	4	3.5	0.5	4	3.5	0.5	4	3	1													0.625		4.0625	3.4375				1	0.75	0.5	0.625
90	2	1	8 6 5 7	4 2 1 3	0.625	0.75	0.25	0.75					0.59375		4	3.25	0.75	3.75	2	1.75	3.5	3.25	0.25	4.75	2.5	2.25													1.25		4	2.75				0.625	0.75	0.25	0.75
91	1	0	4 3 2 1	4 3 2 1	0.75	0.25	0.875	0.75	0.75	0.375	0.625	1	0.65625	0.6875	4.5	5	-0.5	4.5	3.75	0.75	5	3.75	1.25	3.75	2.25	1.5	4.5	4.75	-0.25	5	4.25	0.75	4.75	4.25	0.5	4.25	2.5	1.75	0.75	0.6875	4.4375	3.6875	4.625	3.9375		0.75	0.3125	0.75	0.875
92	2	1	8 7 6 5	4 3 2 1	0.625	0.625	0.25	0	0.625	0.25	0.5	0.875	0.375	0.5625	3.75	1.75	2	3	4	-1	3.75	2	1.75	4.75	3.5	1.25	4.25	4	0.25	4.25	4.25	0	4	4.5	-0.5	3.75	3	0.75	1	0.125	3.8125	2.8125	4.0625	3.9375		0.625	0.4375	0.375	0.4375
93	1	0	4 3 1 2	4 3 1 2	0.5	0.5	0.5	0.75	0.5	0.625	0.5	0.5	0.5625	0.53125	4	5	-1	5	4	1	5	5	0	5	4	1	4.5	3.25	1.25	4	4.5	-0.5	5	5	0	5	5	0	0.25	0.1875	4.75	4.5	4.625	4.4375		0.5	0.5625	0.5	0.625
94	2	1	8 7 5 6	4 3 1 2	0.125	0.375	0.625	1	0	0.375	0.875	0.625	0.53125	0.46875	3.5	4.25	-0.75	2	2.75	-0.75	5	4.5	0.5	4.25	3	1.25	4	4.25	-0.25	2	2.5	-0.5	4	5	-1	3.5	3	0.5	0.0625	-0.3125	3.6875	3.625	3.375	3.6875		0.0625	0.375	0.75	0.8125
95	1	0	4 1 2 3	4 1 2 3	0.625	0.25	0.625	1	0.25	0.875	0.75	0.625	0.625	0.625	3.25	3.75	-0.5	3.5	3.75	-0.25	3.25	3.75	-0.5	5	1.5	3.5	2.75	3.25	-0.5	3.5	2.75	0.75	3.25	3.5	-0.25	4	3	1	0.5625	0.25	3.75	3.1875	3.375	3.125		0.4375	0.5625	0.6875	0.8125
96	2	1	8 5 6 7	4 1 2 3	0.75	0.5	0.25	0.75					0.5625		4.75	3.5	1.25	3	2.75	0.25	4.75	4.75	0	4	3.5	0.5	4	3.75	0.25	3.5	4.25	-0.75	3.75	3	0.75	4.5	3.5	1	0.5	0.3125	4.125	3.625	3.9375	3.625		0.75	0.5	0.25	0.75
97	1	0	4 1 3 2	4 1 3 2	0.5	0.75	0.625	0.875					0.6875		2.75	3.75	-1	3.5	3.5	0	3.25	3.5	-0.25	3.75	2.5	1.25													0		3.3125	3.3125				0.5	0.75	0.625	0.875
98	2	1	8 5 7 6	4 1 3 2	0.5	0.75	0.625	0.875					0.6875		3.75	4.25	-0.5	3.5	3.75	-0.25	4	4.75	-0.75	5	2.25	2.75													0.3125		4.0625	3.75				0.5	0.75	0.625	0.875
99	2	1	1 2 3 4	1 2 3 4	0.5	0.75	0.125	1					0.59375		2	2.25	-0.25	2.25	2.75	-0.5	3.5	3.25	0.25	2.75	2.25	0.5										5	2.25	2.75	0	2.75	2.625	2.625	5	2.25		0.5	0.75	0.125	1
100	2	1	5 6 7 8	1 2 3 4	0.25	0.25		0.875					0.458333		4.75	4.25	0.5	3	3	0				4.25	2	2.25															4	3.08333				0.25	0.25	#DIV/0!	0.875
101	1	0	3 1 2 4	3 1 2 4	0.375	0.375	0.375	0.875					0.5		3.5	4	-0.5	3.5	3.75	-0.25	3.75	3.25	0.5	4.5	3.5	1															3.8125	3.625				0.375	0.375	0.375	0.875
102	2	1	7 5 6 8	3 1 2 4	0.375	1	0.5	0.375					0.5625		4	4.25	-0.25	4.25	4	0.25	4.25	4	0.25	4	4.25	-0.25															4.125	4.125				0.375	1	0.5	0.375
[truncated: 26 more columns]
